# Supplementary material for: Effects of Elevated CO2 on Levels of Primary Metabolites and Transcripts of Genes Encoding Respiratory Enzymes and Their Diurnal Patterns in Arabidopsis thaliana: Possible Relationships with Respiratory Rates
Source: PubMed Central journal article supplement (PMC3913440; doi:10.1093/pcp/pct185), 2014-01-18
Supplement: supp_pct185_pcp-2013-e-00454-File010.pdf [file supp_pct185_pcp-2013-e-00454-File010.pdf]

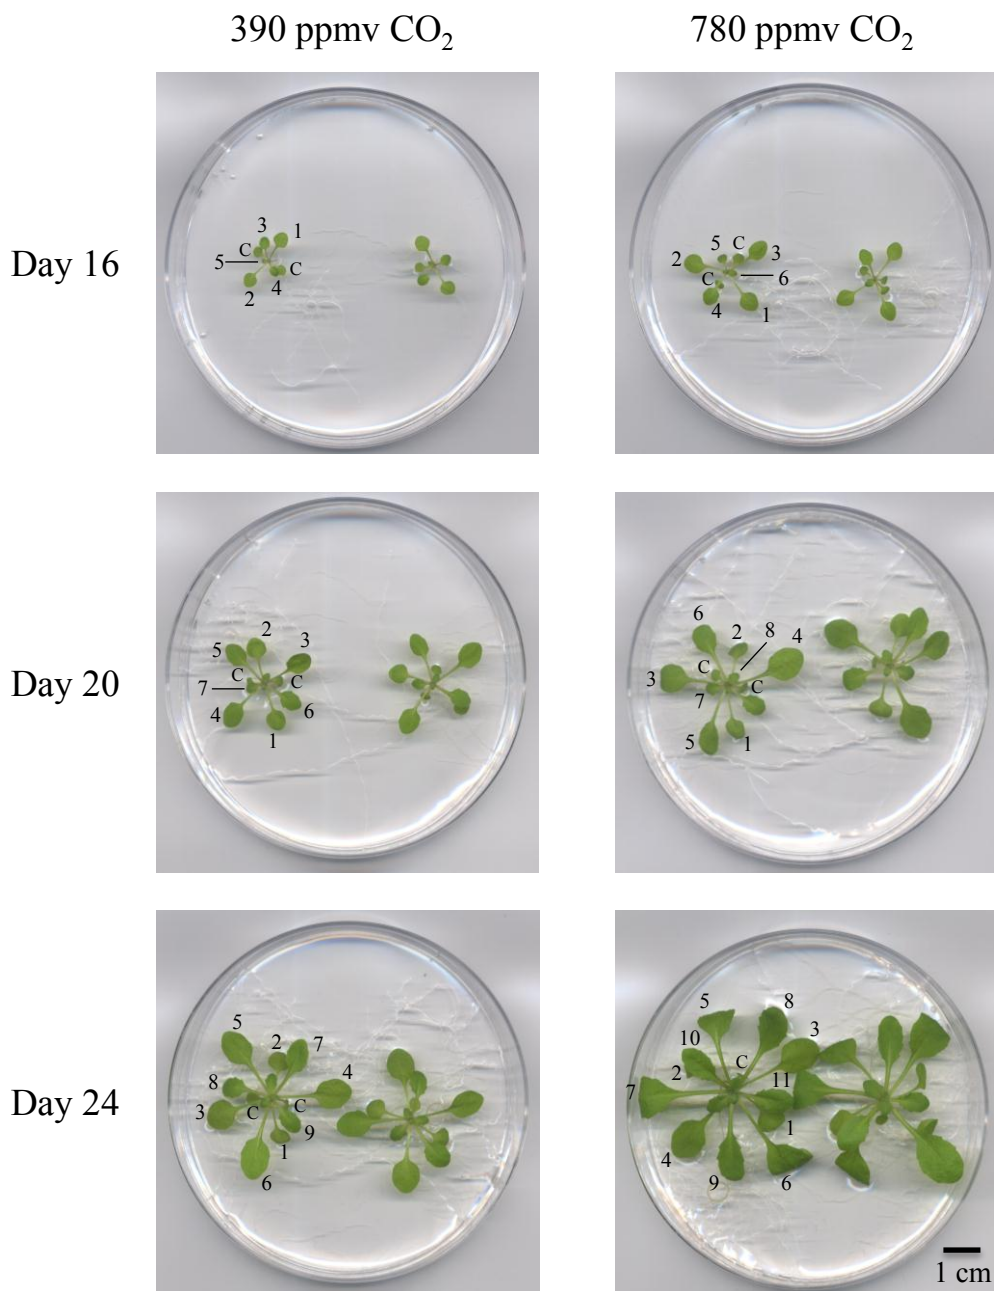

**Figure S1: Day-16, 20 and 24 plants grown at 390 or 780 ppmv CO<sub>2</sub>. The numbers denote the leaf order, and C indicates the cotyledon. In the elevated CO<sub>2</sub>, plants grew faster and leaf numbers increased more than in the ambient CO<sub>2</sub>. Scale bar shows 1 cm.**
