# Supplementary material for: Effects of Elevated CO2 on Levels of Primary Metabolites and Transcripts of Genes Encoding Respiratory Enzymes and Their Diurnal Patterns in Arabidopsis thaliana: Possible Relationships with Respiratory Rates
Source: PubMed Central journal article supplement (PMC3913440; doi:10.1093/pcp/pct185), 2014-01-18
Supplement: supp_pct185_pcp-2013-e-00454-File011.pdf [file supp_pct185_pcp-2013-e-00454-File011.pdf]

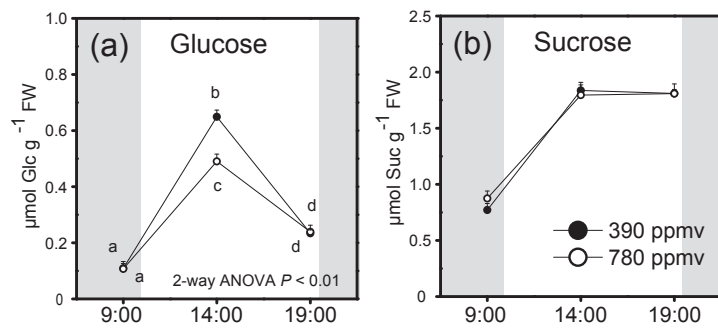

**Figure S2: Diurnal changes in levels of sucrose and glucose in *A. thaliana* shoots. Mean  $\pm$  SEM are shown (n = 4-5). For other details, see the legend of Figure 1.**
